# Supplementary material for: Frequent SLC35A2 brain mosaicism in mild malformation of cortical development with oligodendroglial hyperplasia in epilepsy (MOGHE)
Source: PubMed Central journal article supplement (PMC7788938; doi:10.1186/s40478-020-01085-3), 2021-01-06
Supplement: 40478_2020_1085_MOESM1_ESM.pdf [file 40478_2020_1085_MOESM1_ESM.pdf]

## Frequent *SLC35A2* brain mosaicism in mild malformation of cortical development with oligodendroglial hyperplasia in epilepsy (MOGHE)

Thomas Bonduelle<sup>1</sup>, Till Hartlieb<sup>2,3</sup>, Sara Baldassari<sup>1</sup>, Nam Suk Sim<sup>4</sup>, Se Hoon Kim<sup>5</sup>, Hoon-Chul Kang<sup>6</sup>, Katja Kobow<sup>7</sup>, Roland Coras<sup>7</sup>, Mathilde Chipaux<sup>8</sup>, Georg Dorfmueller<sup>8</sup>, Homa Adle-Biassette<sup>9</sup>, Eleonora Aronica<sup>10,11</sup>, Jeong Ho Lee<sup>\*4,12</sup>, Ingmar Blumcke<sup>\*7</sup> and Stéphanie Baulac<sup>\*1</sup>

<sup>1</sup> Sorbonne Université, Institut du Cerveau - Paris Brain Institute - ICM, Inserm, CNRS, F-75013, Paris, France

<sup>2</sup> Center for pediatric neurology, neurorehabilitation and epileptology, Schoen Klinik, Vogtareuth, Germany

<sup>3</sup> Paracelsus Medical University, Salzburg, Austria

<sup>4</sup> Graduate School of Medical Science and Engineering, KAIST, Daejeon, Korea

<sup>5</sup> Department of Pathology, Yonsei University College of Medicine, Seoul, Korea

<sup>6</sup> Division of Pediatric Neurology, Department of Pediatrics, Pediatric Epilepsy Clinics, Severance Children's Hospital, Yonsei University College of Medicine, Seoul, Korea

<sup>7</sup> Department of Neuropathology, Universitätsklinikum Erlangen, Friedrich-Alexander University (FAU) Erlangen-Nürnberg, Erlangen, Germany

<sup>8</sup> Department of Pediatric Neurosurgery, Rothschild Foundation Hospital, F-75019 Paris, France

<sup>9</sup> Service d'Anatomie et de Cytologie Pathologiques, Hôpital Lariboisière, APHP, 75010, Paris, France

<sup>10</sup> Amsterdam UMC, University of Amsterdam, Department of (Neuro)Pathology, Amsterdam Neuroscience, Amsterdam, the Netherlands

<sup>11</sup> Stichting Epilepsie Instellingen Nederland (SEIN), Heemstede, the Netherlands

<sup>12</sup> SoVarGen, Inc., Daejeon 34051, Republic of Korea.

\* equal contribution

### Corresponding author:

Stéphanie Baulac, PhD

Institut du Cerveau - ICM

Hôpital Pitié-Salpêtrière - 47, bd de l'hôpital - 75013 Paris

Phone : +33 (0)1 57 27 43 39 / E-mail: stephanie.baulac@icm-institute.org

## SUPPLEMENTARY FILES

### Supplemental data Full list of genes included in the panel

*PIK3CA* (NM\_006218), *PIK3R2* (NM\_005027), *PIK3R1* (NM\_181523), *PTEN* (NM\_000314), *AKT1* (NM\_005163), *AKT2* (NM\_001626), *AKT3* (NM\_005465), *GSK3B* (NM\_002093), *GSK3A* (NM\_019884), *MTOR* (NM\_004958), *TSC1* (NM\_000368), *TSC2* (NM\_000548), *TBC1D7* (NM\_016495), *DEPDC5* (NM\_001242896), *NPRL2* (NM\_006545), *NPRL3* (NM\_001077350), *WDR24* (NM\_032259), *MIOS* (NM\_019005), *SEC13* (NM\_183352), *WDR59* (NM\_030581), *SEH1L* (NM\_001013437), *RHEB* (NM\_005614), *RHEBL1* (NM\_144593), *RRAGA* (NM\_006570), *RRAGB* (NM\_016656), *RRAGC* (NM\_022157), *RRAGD* (NM\_021244), *BMT2* (NM\_152556), *DEPTOR* (NM\_022783.3), *RPTOR* (NM\_020761), *MLST8* (NM\_001199173.1), *AKT1S1* (NM\_032375), *RICTOR* (NM\_001285439.1), *PRR5* (NM\_001198721), *PRR5L* (NM\_024841), *MAPKAP1* (NM\_001006617), *PDPK1* (NM\_002613), *RPS6KB1* (NM\_003161.3), *RPS6KB2* (NM\_003952), *SESN1* (NM\_014454), *SESN2* (NM\_031459), *SESN3* (NM\_144665.3), *CASTOR1* (NM\_001037666), *CASTOR2* (NM\_001145064), *FLCN* (NM\_144997), *KPTN* (NM\_007059), *SZT2* (NM\_015284.3), *ITFG2* (NM\_018463), *C12ORF66* (NM\_001300940), *DDIT4* (NM\_019058), *LAMTOR1* (NM\_017907), *LAMTOR2* (NM\_014017), *LAMTOR3* (NM\_021970), *LAMTOR4* (NM\_001008395.3), *LAMTOR5* (NM\_006402), *SLC38A9* (NM\_173514), *SLC35A2* (NM\_005660.2), *KRT1* (NM\_006121), *KRT10* (NM\_000421), *SRY* (NM\_003140).

**Supplementary Table 1** Neuropathological reassessment of multicentric cohort of 43 MCD cases

| Patient ID | Initial histology                                                                                 | Histology reclassified                                | Genetic findings           | Previous report               |
|------------|---------------------------------------------------------------------------------------------------|-------------------------------------------------------|----------------------------|-------------------------------|
| FR-1       | mMCD2, blurred grey-white matter border*                                                          | MOGHE                                                 | SLC35A2:p.Tyr267*          | Baldassari <i>et al.</i> 2019 |
| FR-2       | mMCD2, blurred grey-white matter border, increased oligodendrocytes density*                      | MOGHE                                                 | SLC35A2:p.Ser212Leufs*9    | Baldassari <i>et al.</i> 2019 |
| FR-3       | mMCD2, blurred grey-white matter border*                                                          | MOGHE                                                 | SLC35A2:p.Leu296del        | Baldassari <i>et al.</i> 2019 |
| FR-4       | mMCD2, blurred grey-white matter border, increased oligodendrocytes density, white matter pallor* | MOGHE                                                 | SLC35A2:p.Pro269Thrfs*25   | Baldassari <i>et al.</i> 2019 |
| FR-5       | FCD unclassified                                                                                  | MOGHE                                                 | SLC35A2:p.Leu307_Val310del | unpublished                   |
| FR-6       | Not conclusive (fragmented tissue)                                                                | Not conclusive (fragmented tissue)                    | SLC35A2: p.His96Profs*7    | unpublished                   |
| FR-7       | mMCD2                                                                                             | mMCD                                                  | Panel-negative             | Baldassari <i>et al.</i> 2019 |
| FR-8       | mMCD2                                                                                             | mMCD                                                  | Panel-negative             | Baldassari <i>et al.</i> 2019 |
| FR-9       | mMCD2                                                                                             | mMCD                                                  | Panel-negative             | Baldassari <i>et al.</i> 2019 |
| FR-10      | mMCD2                                                                                             | MCD with gliosis and possible sEEG-induced infarction | Panel-negative             | Baldassari <i>et al.</i> 2019 |
| FR-11      | FCD1b                                                                                             | MCD with possible sEEG-induced infarction             | Panel-negative             | Baldassari <i>et al.</i> 2019 |
| FR-12      | FCD1                                                                                              | FCD3d with L4 necrosis                                | Panel-negative             | Baldassari <i>et al.</i> 2019 |

|       |                |                        |                         |                               |
|-------|----------------|------------------------|-------------------------|-------------------------------|
| FR-13 | FCD1a          | FCD1a                  | Panel-negative          | Baldassari <i>et al.</i> 2019 |
| FR-14 | FCD1a          | Likely mMCD            | Panel-negative          | Baldassari <i>et al.</i> 2019 |
| FR-15 | mMCD2          | mMCD                   | Panel-negative          | unpublished                   |
| FR-16 | FCD1b          | HS type I and mMCD     | Panel-negative          | Baldassari <i>et al.</i> 2019 |
| FR-17 | mMCD2          | mMCD                   | Panel-negative          | Baldassari <i>et al.</i> 2019 |
| FR-18 | FCD1a          | No HS, temporal cortex | Panel-negative          | Baldassari <i>et al.</i> 2019 |
| FR-19 | FCD1           | Ulegyria or HET        | Panel-negative          | Baldassari <i>et al.</i> 2019 |
| FR-20 | mMCD2          | Infarction             | Panel-negative          | Baldassari <i>et al.</i> 2019 |
| NL-1  | mMCD2          | MOGHE                  | SLC35A2:p.Gln129*       | unpublished                   |
| NL-2  | mMCD2          | MOGHE                  | SLC35A2:p.Gln185*       | unpublished                   |
| NL-3  | FCD2a          | FCD 2a                 | DEPDC5:p.Thr1385fs      | unpublished                   |
| NL-4  | FCD2a          | FCD 2a                 | DEPDC5:p.Ala1386fs      | unpublished                   |
| NL-5  | FCD2a          | FCD 2a                 | DEPDC5:p.Asn1353fs      | unpublished                   |
| NL-6  | FCD2a          | FCD 2a                 | DEPDC5:p.Gly756fs       | unpublished                   |
| KR-1  | mMCD           | MOGHE                  | SLC35A2:p.Asn235His     | Sim <i>et al.</i> 2018        |
| KR-2  | Gliosis        | MOGHE                  | SLC35A2:c.275-1G>T      | Sim <i>et al.</i> 2018        |
| KR-3  | No abnormality | MOGHE                  | SLC35A2:p.Gln185*       | Sim <i>et al.</i> 2018        |
| KR-4  | mMCD           | MOGHE                  | SLC35A2:p.Glu254*       | Sim <i>et al.</i> 2018        |
| KR-5  | mMCD           | MOGHE                  | SLC35A2:p.Gln197*       | Sim <i>et al.</i> 2018        |
| KR-6  | mMCD           | MOGHE                  | SLC35A2:p.Gln168*       | Sim <i>et al.</i> 2018        |
| KR-7  | Gliosis        | MOGHE                  | SLC35A2:p.Leu120Pro     | Sim <i>et al.</i> 2019        |
| KR-8  | Gliosis        | MOGHE                  | SLC35A2:p.Gly281Asp     | Sim <i>et al.</i> 2019        |
| KR-9  | Gliosis        | MOGHE                  | SLC35A2:p.Leu224Pro     | Sim <i>et al.</i> 2019        |
| KR-10 | mMCD           | MOGHE                  | SLC35A2:p.Leu120Hisfs*7 | unpublished                   |

|       |                |              |                                          |                           |
|-------|----------------|--------------|------------------------------------------|---------------------------|
| KR-11 | FCD2a          | FCD2a        | DEPDC5:p.Gln372*                         | Sim <i>et al.</i><br>2019 |
| KR-12 | FCD2b          | FCD2a        | DEPDC5:p.Phe1399fs<br>DEPDC5:p.Thr1508fs | Sim <i>et al.</i><br>2019 |
| KR-13 | FCD2a          | FCD2a        | DEPDC5:p.Trp1213*                        | Sim <i>et al.</i><br>2019 |
| KR-14 | FCD2a          | FCD2a        | DEPDC5:p.Arg1268*                        | Sim <i>et al.</i><br>2019 |
| KR-15 | mMCD           | FCD2a        | <i>DEPDC5:c.3021+1G&gt;A</i>             | Sim <i>et al.</i><br>2019 |
| KR-16 | FCD2a          | FCD2a        | DEPDC5:p.Arg1136*                        | Sim <i>et al.</i><br>2019 |
| KR-17 | No abnormality | Inconclusive | DEPDC5:c.1324+1G>A                       | Sim <i>et al.</i><br>2019 |

GM: grey matter; WM: white matter; mMCD: mild Malformations of Cortical Development; FCD: Focal Cortical Dysplasia; sEEG: stereo EEG; HS: Hippocampal Sclerosis; HET: Heterotopia.

**Supplementary Table 2** Clinical comparisons between *SLC35A2*-mutated and panel-negative MOGHE cases

|                                                                            | <b>MOGHE <i>SLC35A2</i>-<br/>mutated cases<br/>(n=26)</b> | <b>MOGHE without<br/>variant identified<br/>(n=11)</b> | <b>p-value</b> |
|----------------------------------------------------------------------------|-----------------------------------------------------------|--------------------------------------------------------|----------------|
| <b>Age at epilepsy onset</b><br>(years, mean)                              | 1.3<br>[0.25-7]                                           | 2.1<br>[0.25-6.25]                                     | 0.13           |
| <b>Duration of epilepsy<br/>before surgery</b><br>(years, mean)            | 4.4<br>[1-16.7]                                           | 6.9<br>[0.33-21.8]                                     | 0.29           |
| <b>Infantile spasms</b><br>(%)                                             | 77%<br>(n=20/26)                                          | 36%<br>(n=4/11)                                        | <b>0.01</b>    |
| <b>Tonic seizures</b><br>(%)                                               | 66%<br>(n=12/18)                                          | 90%<br>(n=10/11)                                       | 0.13           |
| <b>Myoclonic seizures</b><br>(%)                                           | 31%<br>(n=8/26)                                           | 45%<br>(n=5/11)                                        | 0.39           |
| <b>Autistic features</b><br>(%)                                            | 31%<br>(n=8/24)                                           | 27%<br>(n=3/11)                                        | 0.72           |
| <b>Developmental delay</b><br>(including mild, moderate<br>and severe) (%) | 92%<br>(n=24/26)                                          | 90%<br>(n=10/11)                                       | 0.88           |
| <b>Good post-operative<br/>outcome</b><br>(Engel I-II, %)                  | 77%<br>(n=20/26)                                          | 80%<br>(n=8/10)                                        | 0.84           |
| <b>Poor post-operative<br/>outcome</b><br>(Engel III-IV, %)                | 23%<br>(n=6/26)                                           | 20%<br>(n=2/10)                                        | 0.84           |
| <b>Multiple surgeries</b><br>(%)                                           | 15%<br>(n=4/26)                                           | 9%<br>(n=1/11)                                         | 0.6            |

MOGHE *SLC35A2*-mutated cohort (n=26) was obtained associating German *SLC35A2*-MOGHE cases identified in this study (n=9) together with multicentric histologically reassessed *SLC35A2*-MOGHE cases (n=5 from France, n=10 from Republic of Korean and n=2 from the Netherlands). MOGHE patients without variant identified (n=11) correspond to panel-negative German MOGHE cases. All percentages are presented based on each available patient's characteristics. Statistical analysis were performed using Chi-2 test for percentages comparisons and Wilcoxon test for mean comparisons.
